# Supplementary material for: The enhancement of photocatalytic performance of SrTiO3 nanoparticles via combining with carbon quantum dots
Source: Royal Society of Chemistry journal article supplement (doi:10.1039/c8ra02103a), 2018-01-01
Supplement: c8ra02103a1.pdf [file c8ra02103a1.pdf]

## Supplementary Information

### The enhancement of photocatalytic performance of $\text{SrTiO}_3$ nanoparticles via combining with carbon quantum dots

Haitao Ren, Lin Ge, Qian Guo, Lu Li, Guangkuo Hu, and Jiangong Li\*

*Institute of Materials Science and Engineering, Lanzhou University, Lanzhou 730000,  
China*

E-mail: lijg@lzu.edu.cn; Fax: +86 931 8910364

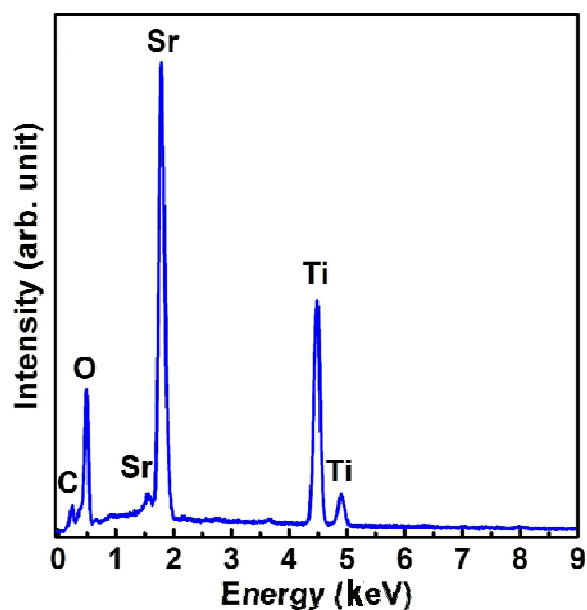

Fig. S1 EDS pattern of the CQD/ $\text{SrTiO}_3$  nanocomposite.

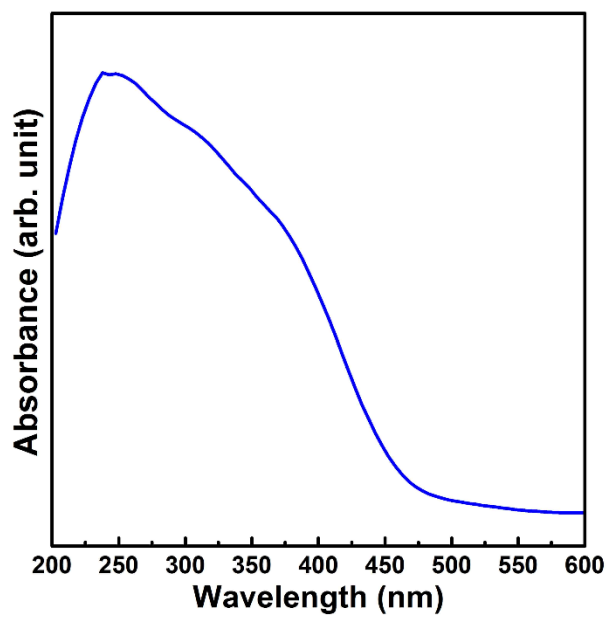

Fig. S2 UV-vis absorption spectrum of the CQDs.

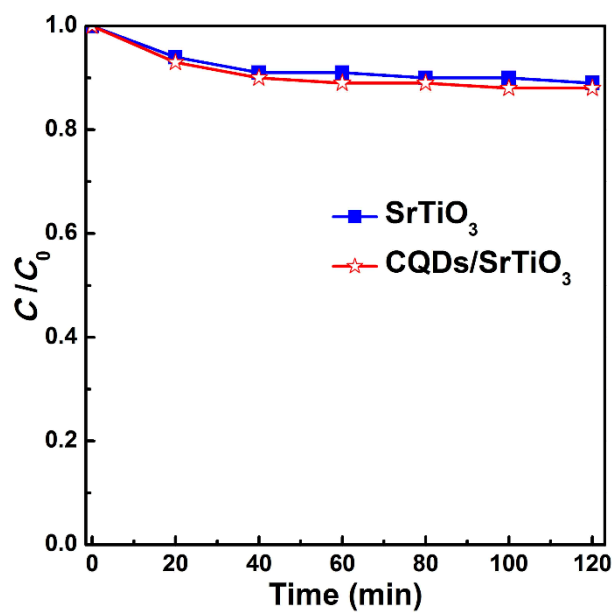

Fig. S3 Time profiles of adsorption of pure  $\text{SrTiO}_3$  and the  $\text{CQD/SrTiO}_3$  nanocomposite in dark for RhB.

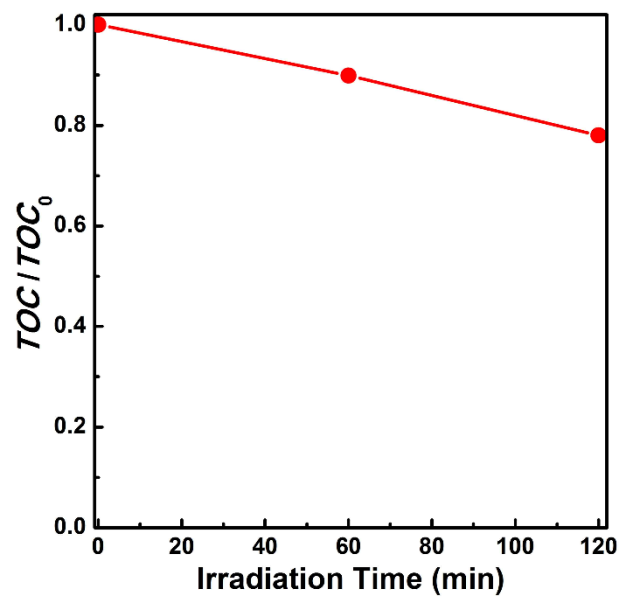

**Fig. S4** TOC removal during the RhB degradation by the CQD/SrTiO<sub>3</sub> nanocomposite.
